# Supplementary material
Source: PubMed Central journal article supplement (PMC6214765)

**Figure Legend:**

**Figure 1. Receiver Operating Characteristic Curves.** Receiver operating characteristic (ROC) curves for % predicted forced vital capacity (FVC) and diffusing capacity of the lung for carbon monoxide (DLCO) demonstrating the performance of varying FVC and DLCO % predicted cut-points for associated radiographic interstitial lung disease (ILD) in systemic sclerosis.

**Supplementary Figure 1: Derivation of Analysis Sample.** HRCT= High-resolution computed tomography; lcSSc= Limited cutaneous systemic sclerosis; dcSSc= diffuse cutaneous systemic sclerosis; SSS= systemic sclerosis sine scleroderma; PFT= pulmonary function test; FVC = forced vital capacity (% predicted); DLCO= diffusing capacity of the lung for carbon monoxide, corrected for hemoglobin (% predicted); IVC = inspiratory vital capacity.

Supplementary Figure 1.

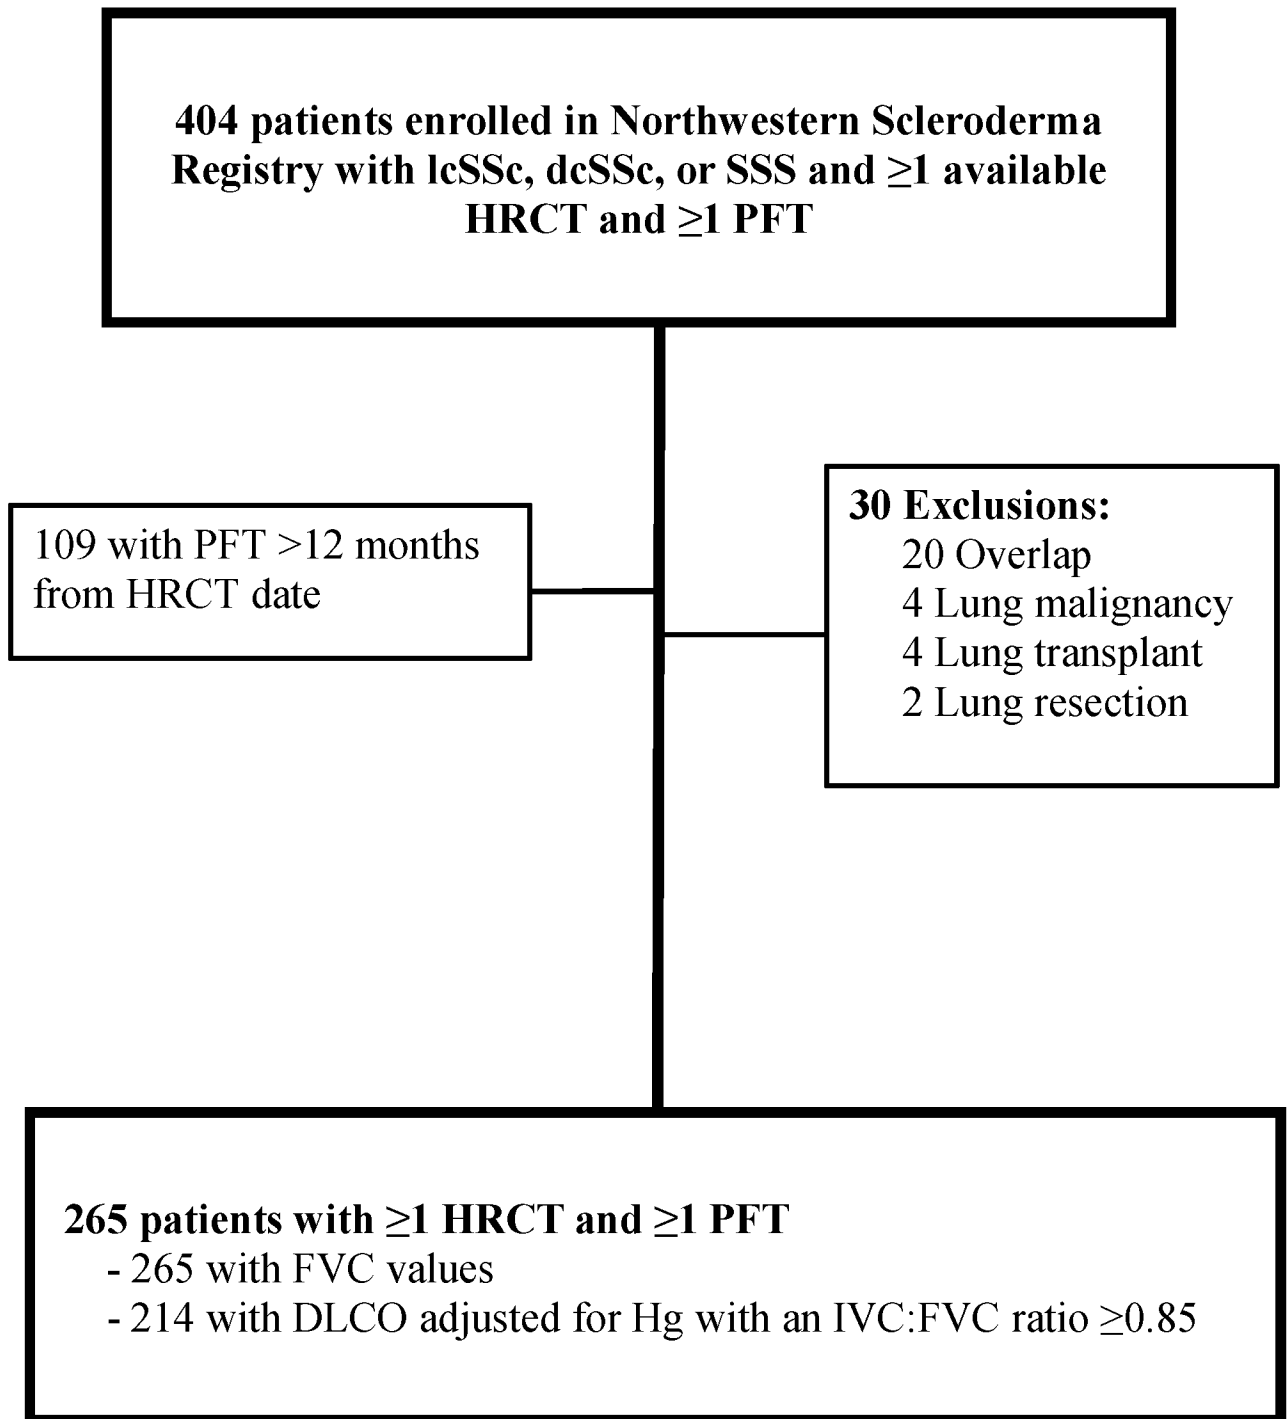

Supplement: NIHMS973818-supplement-supplement_1.pdf [file NIHMS973818-supplement-supplement_1.pdf]
